# Supplementary material for: Enhanced daytime secondary aerosol formation driven by gas–particle partitioning in downwind urban plumes
Source: Copernicus journal article supplement (doi:10.5194/acp-24-13065-2024), 2024-11-27
Supplement: Supplementary file 1 [file acp-24-13065-2024-supplement.pdf]

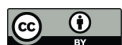

*Supplement of*

## **Enhanced daytime secondary aerosol formation driven by gas–particle partitioning in downwind urban plumes**

**Mingfu Cai et al.**

*Correspondence to:* Bin Yuan (byuan@jnu.edu.cn)

The copyright of individual parts of the supplement might differ from the article licence.

28 Table S1. Fitting parameters  $a$  and  $b$  of different calibration experiments.

| Experiment No. | Particle diameter (nm) | Mass loading (ng) | $a$    | $b$   |
|----------------|------------------------|-------------------|--------|-------|
| 1              | 200                    | 150.7             | -0.197 | 1.056 |
| 2              | 200                    | 241               | -0.167 | 1.768 |
| 3              | 200                    | 407               | -0.206 | 3.732 |
| 4              | 100                    | 90.5              | -0.218 | 3.641 |
| 5              | 100                    | 110.6             | -0.241 | 5.229 |
| 6              | 100                    | 150.8             | -0.243 | 4.451 |

29

30 Table S2. The detailed information of three selected periods.

|                         | Periods                                                                           | Days |
|-------------------------|-----------------------------------------------------------------------------------|------|
| Long-range<br>Transport | 14-20 October; 29 October-1 November; 3-4 November; 7-10<br>November; 14 November | 18   |
| Urban Air<br>Masses     | 7-9 October; 23-27 October; 1-2 November; 13 November                             | 11   |
| Coastal Air<br>Masses   | 2-4 October; 10-12 October; 22 October; 12 November                               | 8    |

31

32

33

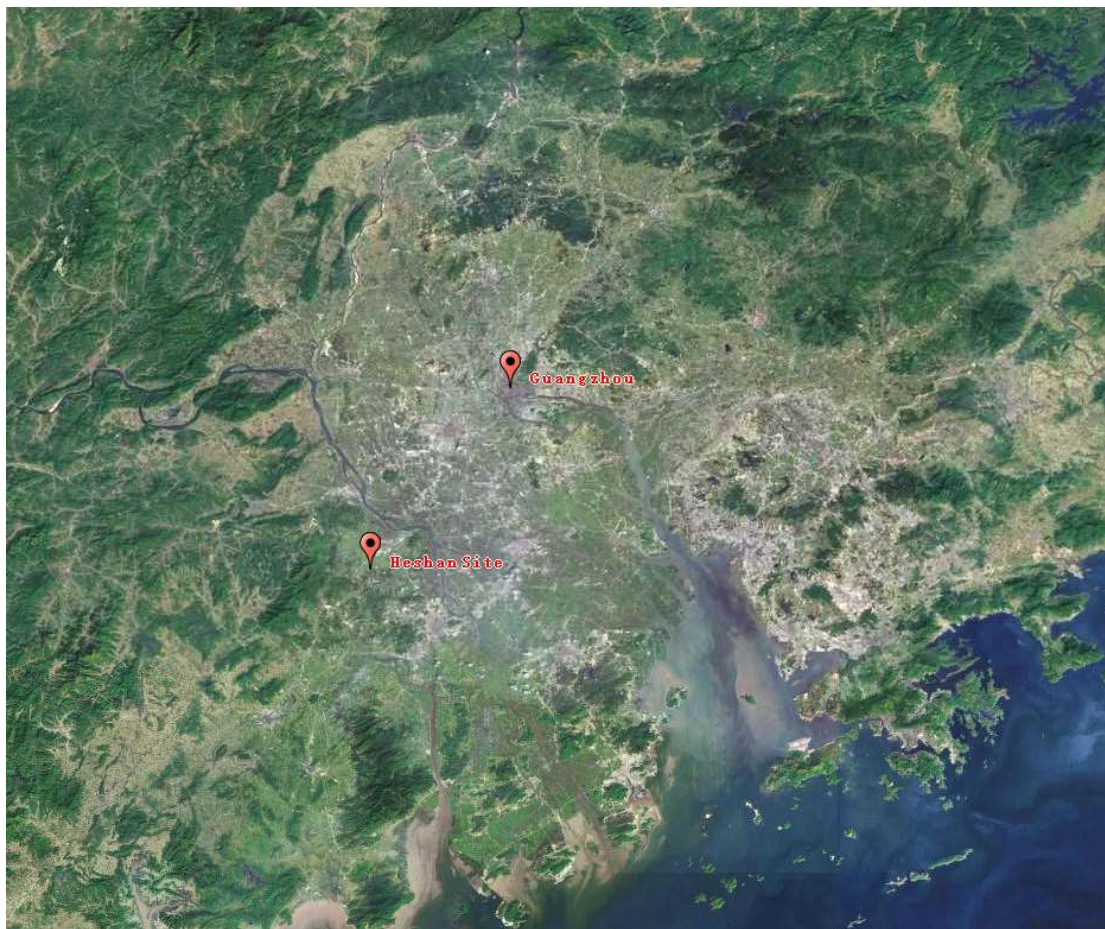

34

35 Figure S1. Location of the measurement site and Guangzhou city. This map was obtained from Map  
36 World ([www.tianditu.gov.cn](http://www.tianditu.gov.cn)).

37

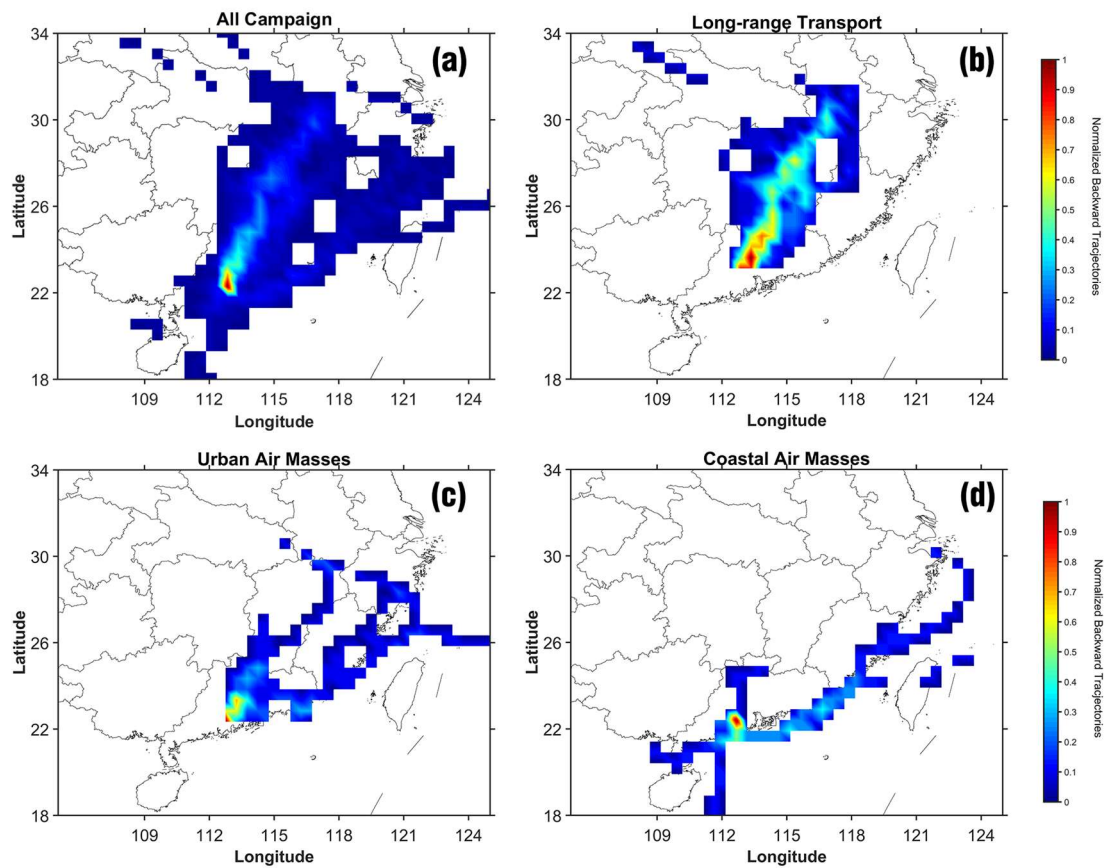

38

39 Figure S2. Normalized 72 hours backward trajectories arriving at the measurement site during (a)  
 40 the whole measurement, (b) long-range transport period, (c) urban air masses period, and (d)  
 41 coastal air masses period.  
 42

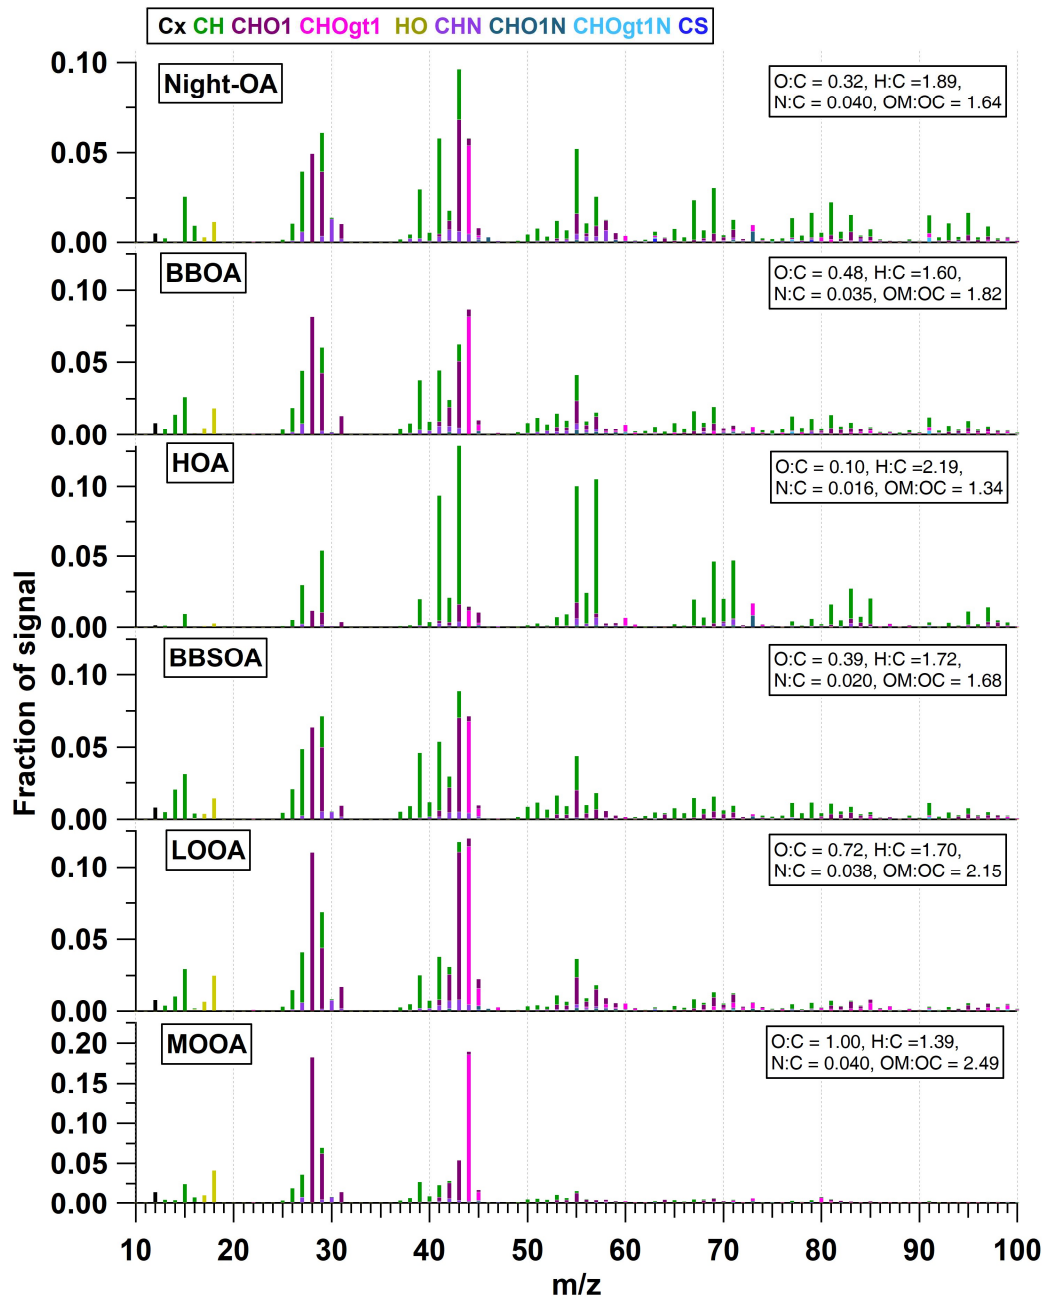

43  
44  
45

Figure S3. Mass spectral profile of six OA factors. The colors represent different family groups.

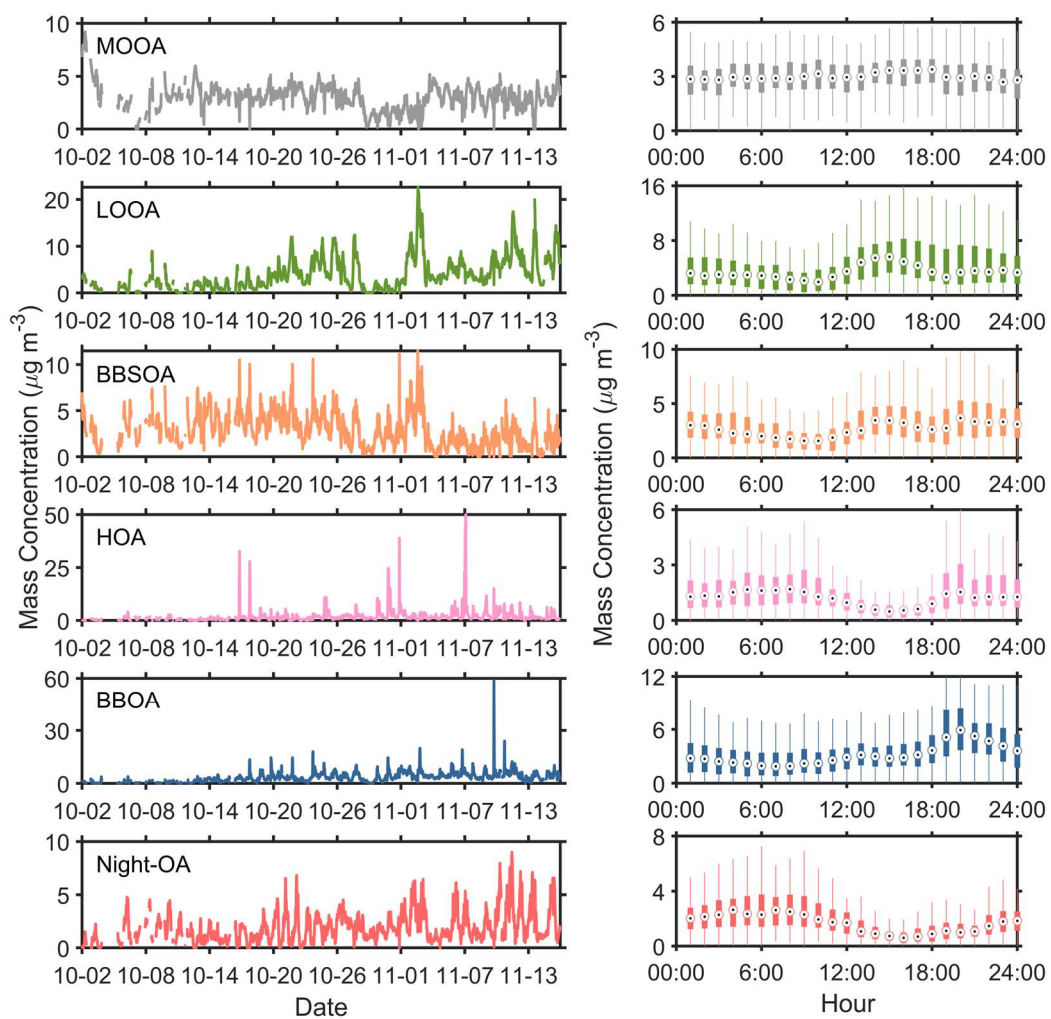

46

47 Figure S4. Timeseries and diurnal variation of six OA factors.

48

49

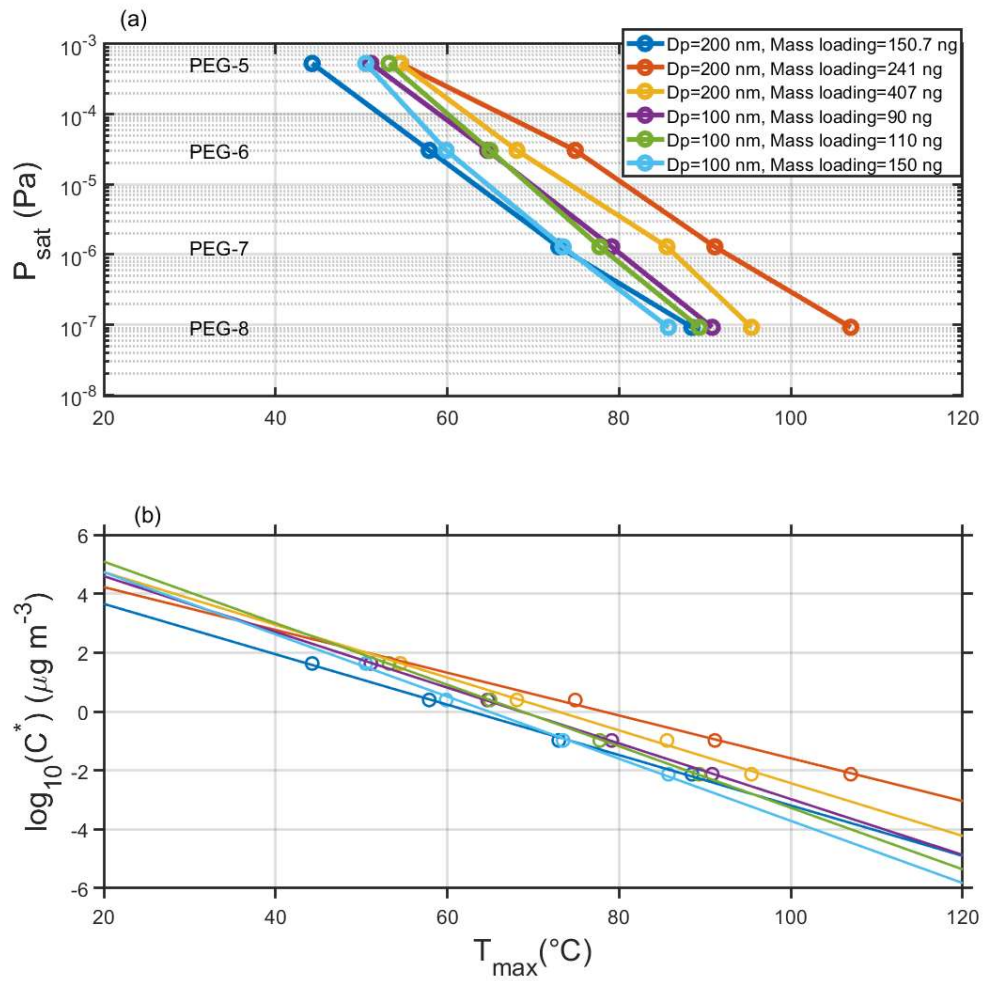

50  
 51 Figure S5. (a) Measured  $T_{max}$  vs  $P_{sat}$  literature values for PEG 5-8 at different diameters and  
 52 collected mass loadings and (b) corresponding fitted calibration lines.  
 53



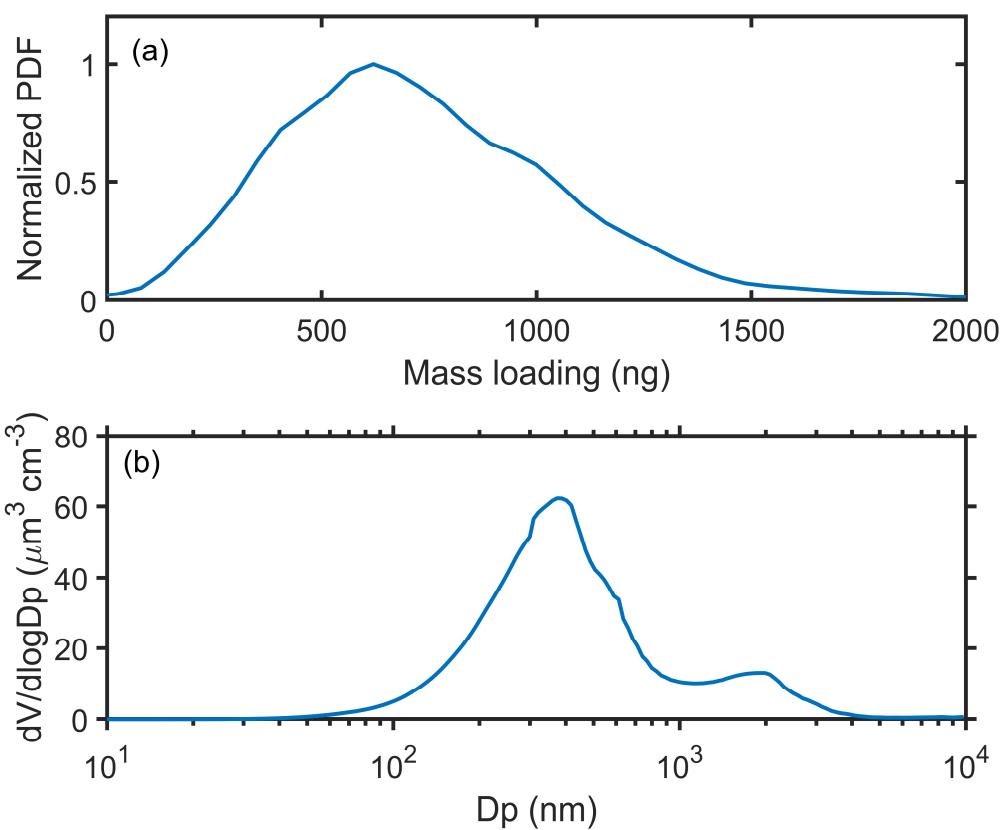

54

55 Figure S6. (a) Normalized probability density function of collected mass loading on the filter of the  
 56 FIGAERO-I-CIMS and (b) the average particle volume size distribution. The collected mass loading  
 57 is calculated based on collection time, flow rate through the filter, and the organic concentration  
 58 measured by the SP-AMS.

59

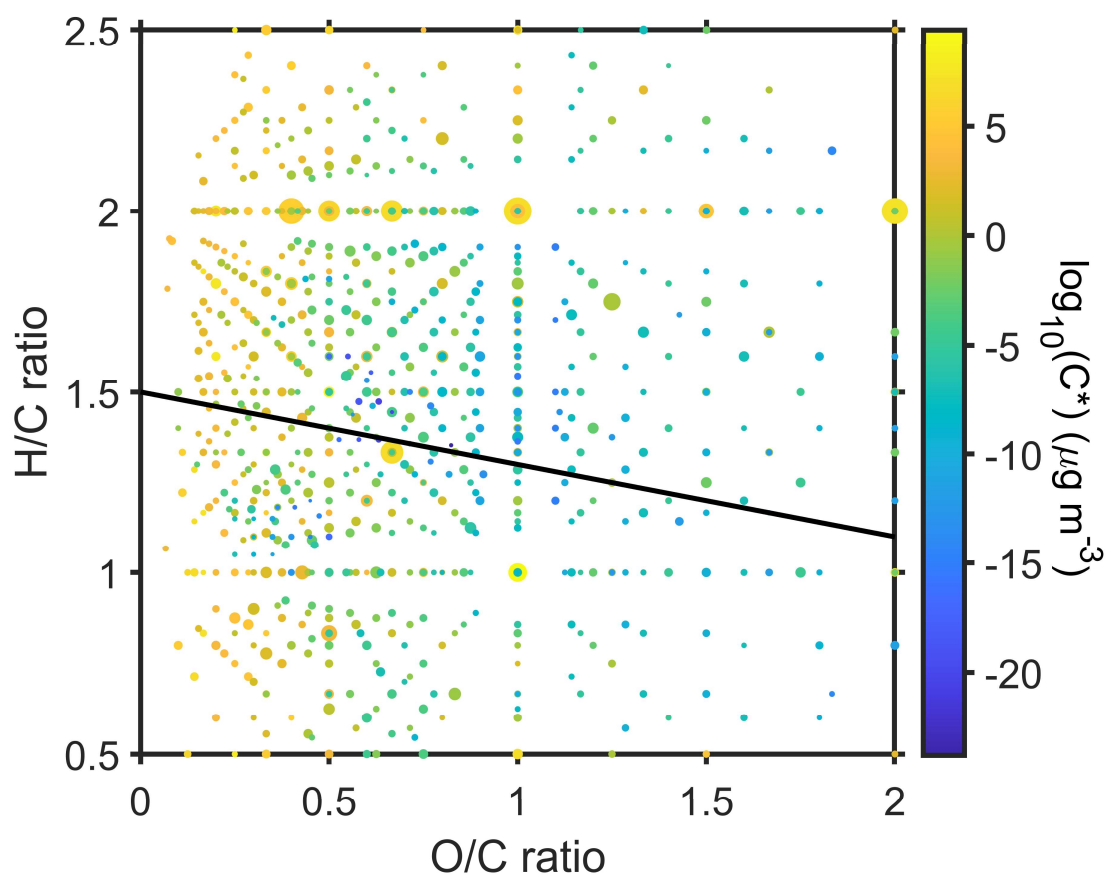

60

61 Figure S7. Van-Krevelen diagram (O/C ratio versus H/C ratio) of gas-phase organic compounds  
 62 measured by FIGAERO-CIMS. The symbol size is proportional to the mass concentration of organic  
 63 vapors and the color code represents the volatility. The black solid line divided the organic vapors  
 64 potentially formed through the autoxidation pathway (upper regime) and multi-generation OH  
 65 oxidation pathway (lower regime), based on the oxidation products aromatics and monoterpene,  
 66 respectively (Wang et al., 2022; Wang et al., 2020).

67

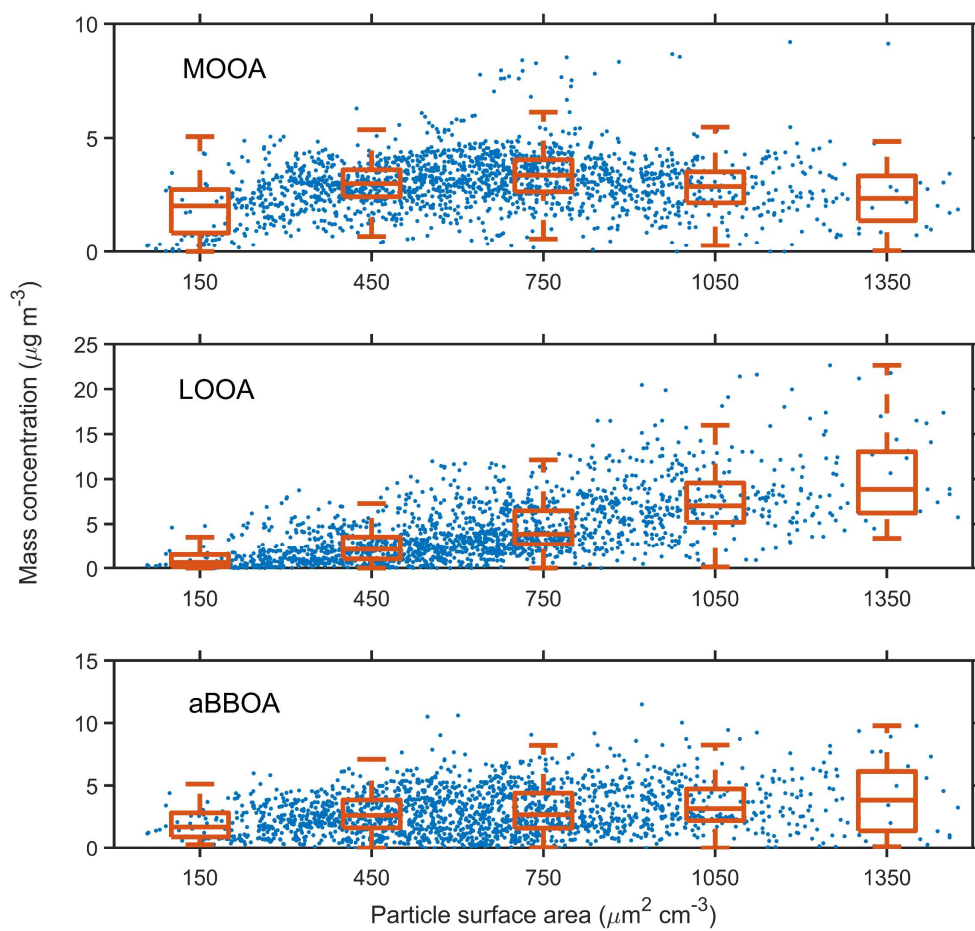

68

69 Figure S8. Relationship between particle surface area and SOA factors (MOOA, LOOA and  
 70 aBBOA).

71

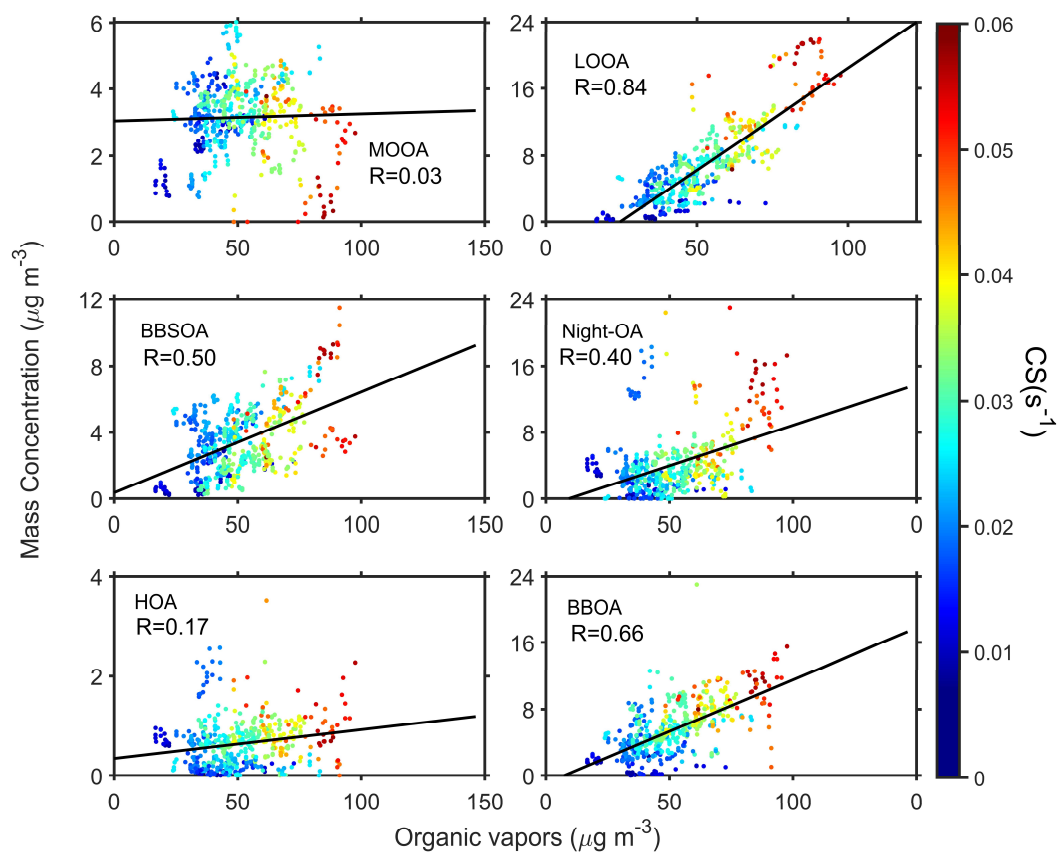

73

74 Figure S9. Relationship between the concentration of organic vapors and six OA PMF factors. The  
 75 color represents the CS values.

76

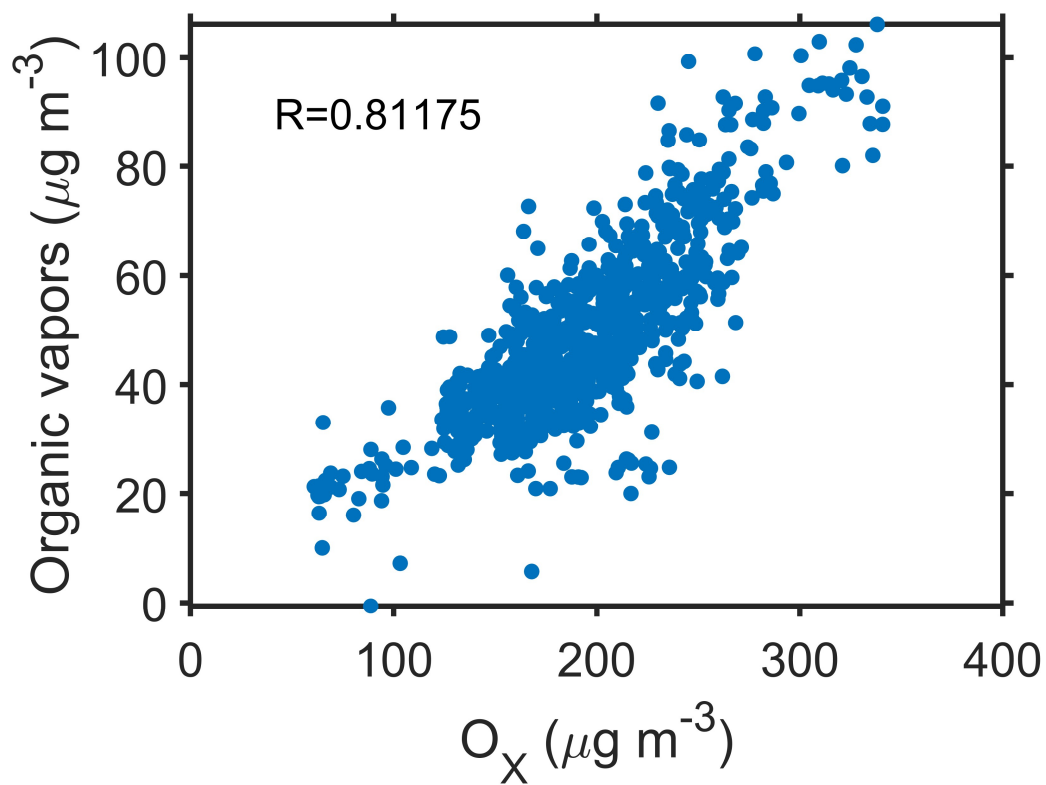

78

79 Figure S10. Relationship between odd-oxygen ( $O_X$ ,  $O_X=O_3+NO_2$ ) and the concentration of organic  
80 vapors measured by the FIGAERO-CIMS in the afternoon (10:00-16:00 LT).

81

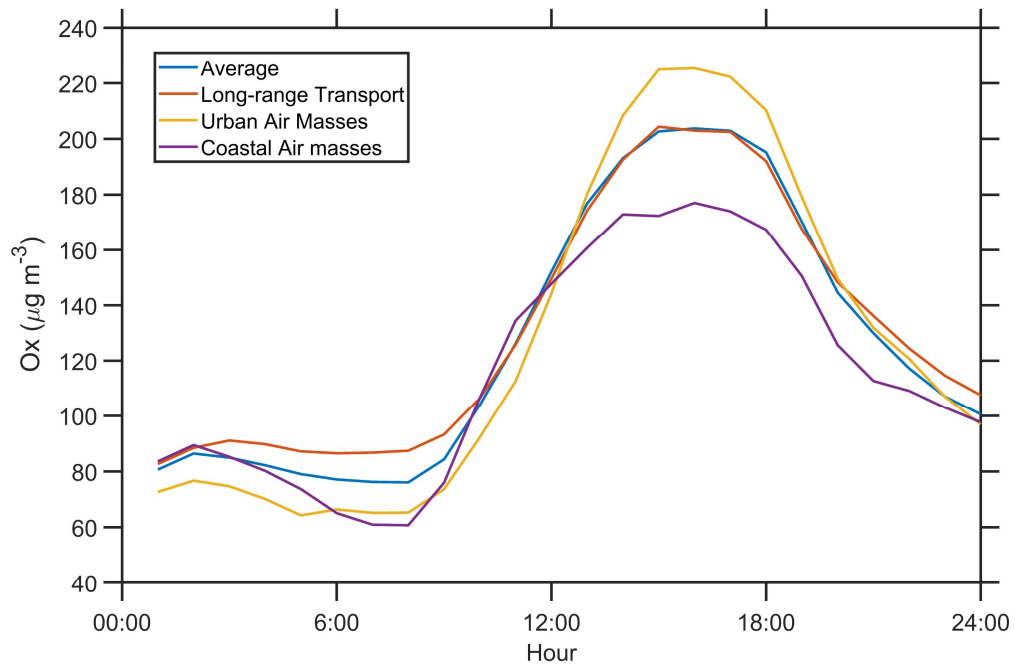

82

83 Figure S11. The average diurnal variation of O<sub>x</sub> during the whole campaign, long-range transport,  
 84 urban air masses, and coastal air masses periods.

85

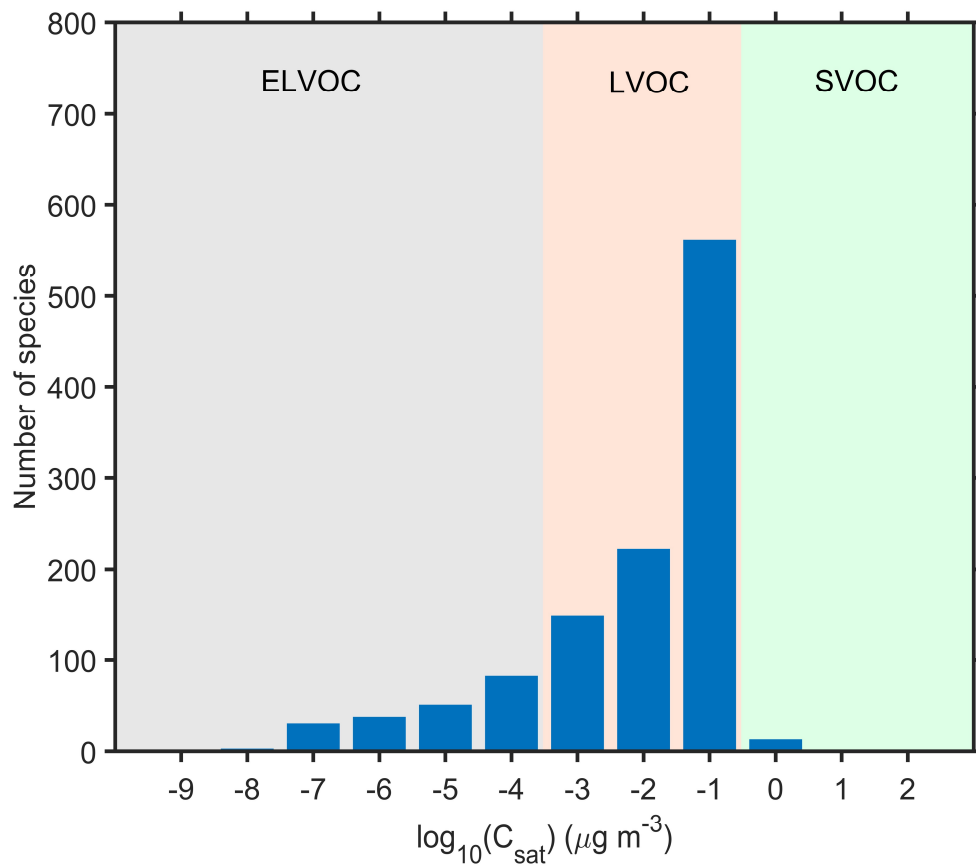

87

88 Figure S12. Volatility distribution of the number of calibrated and semi-quantified species  
89 measured by the FIGAERO-CIMS.

90

91

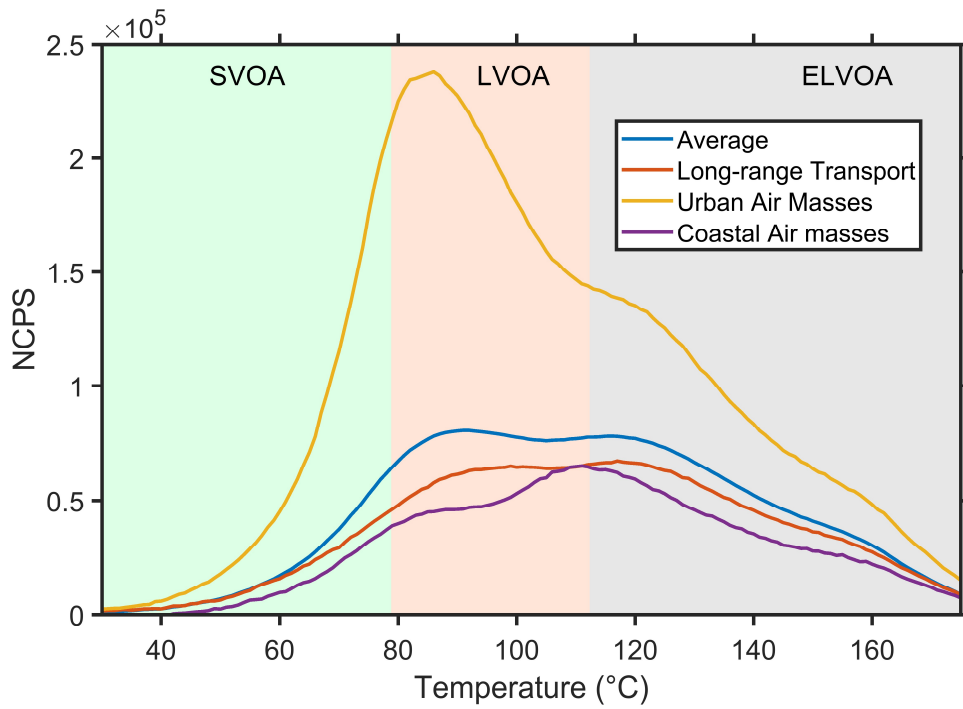

92

93 Figure S13. Average sum thermograms measured by the FIGAERO-CIMS in the afternoon  
 94 (12:00-16:00 LT) during the whole campaign, long-range transport, urban air masses, and coastal  
 95 air masses periods.

96



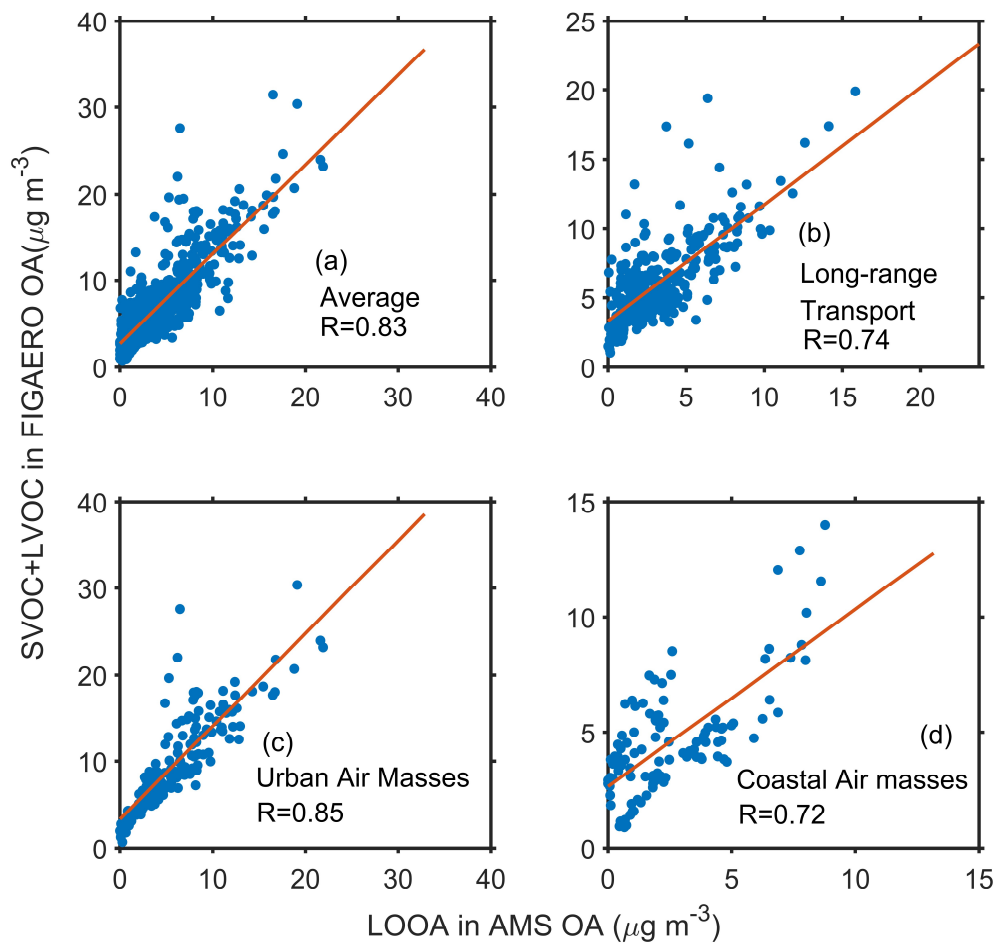

98

99 Figure S14. Relationship between the SVOC+LVOC in FIGAERO OA and LOOA in AMS OA  
 100 during (a) the whole campaign, (b) long-range transport, (c) urban air masses, and (d) coastal air  
 101 masses periods.

102

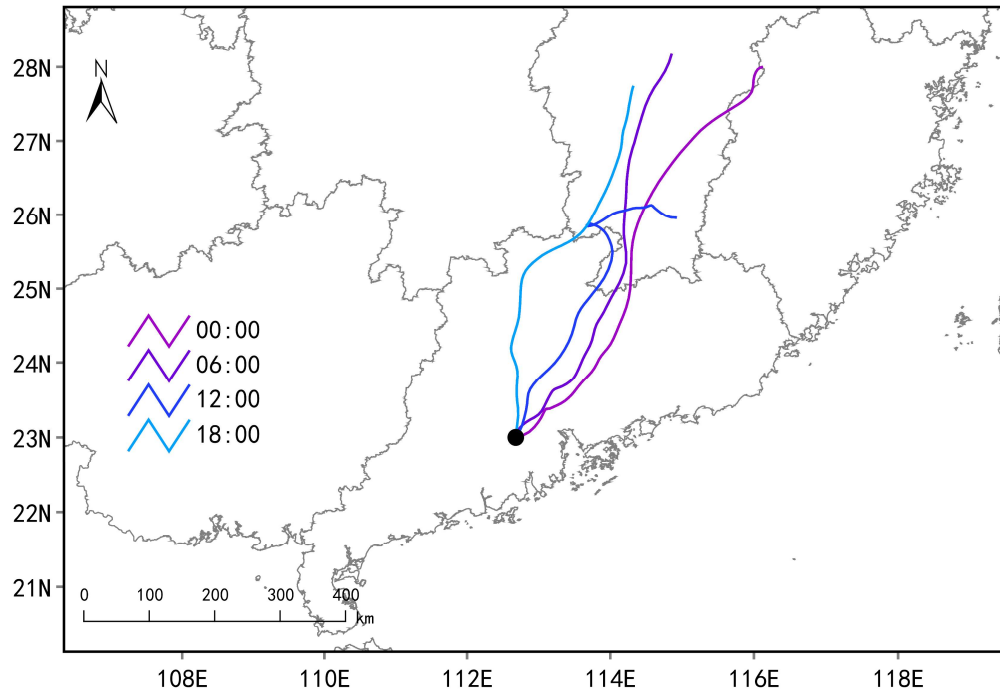

103

104 Figure S15. 72h backward trajectories arriving at the measurement site with 500 m height at  
105 00:00, 06:00, 12:00, and 18:00 on 2 November 2019.

106

107

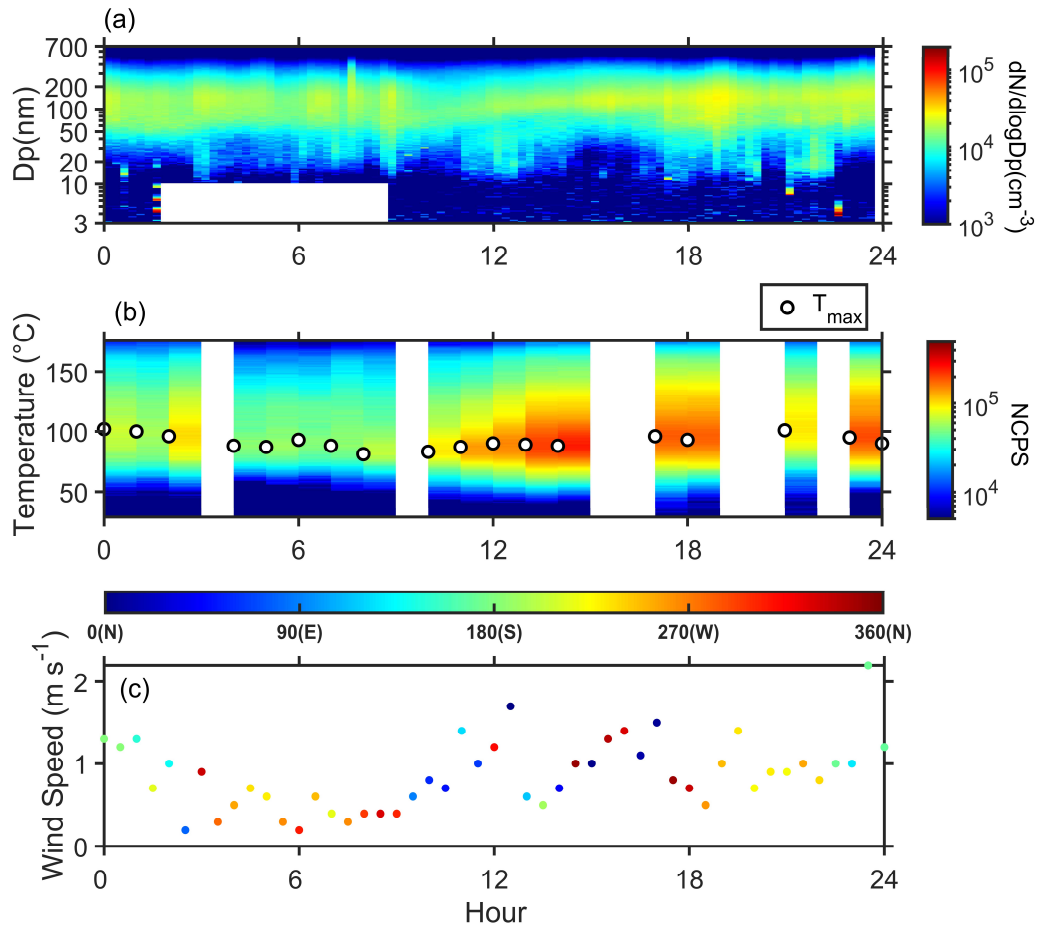

108

109 Figure S16. Variation of (a) PNSD, (b) sum thermograms, and (c) wind speed and direction on 2  
 110 November 2019.

111

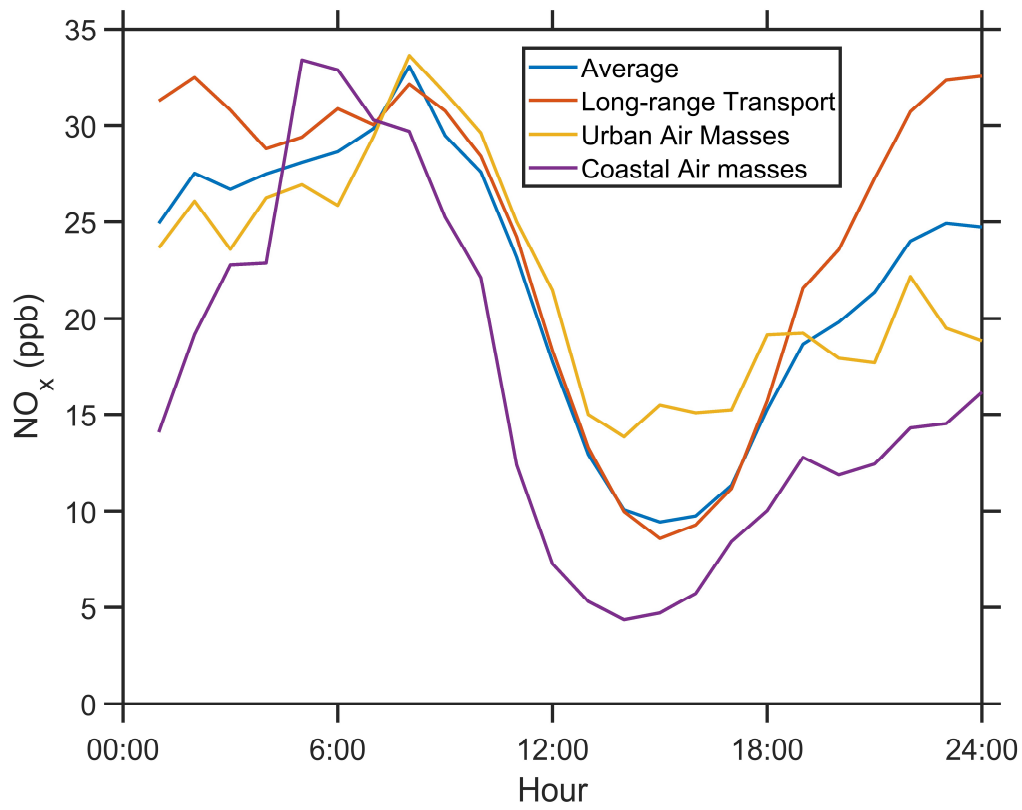

112

113 Figure S17. The average diurnal variation of  $\text{NO}_x$  during the whole campaign and three selected  
 114 periods.

115

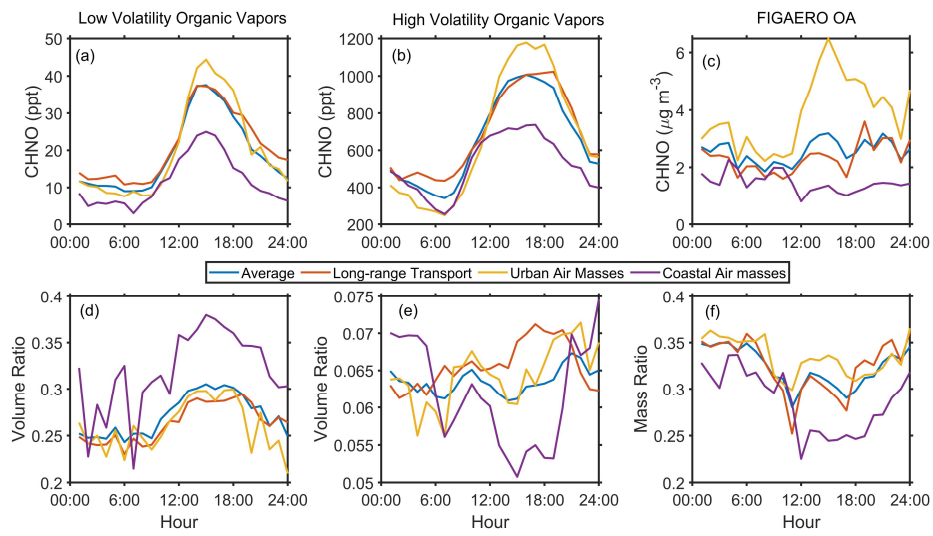

117

118 Figure S18. Diurnal variation of CHON compounds in (a) low volatility organic vapors, (b) high  
 119 volatility organic vapors, and (c) FIGAERO OA and (d-f) their corresponding mass ratio.

120

## 121 **References**

- 122 Nie, W., Yan, C., Huang, D. D., Wang, Z., Liu, Y., Qiao, X., Guo, Y., Tian, L., Zheng, P., Xu, Z., Li, Y.,  
123 Xu, Z., Qi, X., Sun, P., Wang, J., Zheng, F., Li, X., Yin, R., Dallenbach, K. R., Bianchi, F., Petäjä, T.,  
124 Zhang, Y., Wang, M., Schervish, M., Wang, S., Qiao, L., Wang, Q., Zhou, M., Wang, H., Yu, C., Yao, D.,  
125 Guo, H., Ye, P., Lee, S., Li, Y. J., Liu, Y., Chi, X., Kerminen, V.-M., Ehn, M., Donahue, N. M., Wang, T.,  
126 Huang, C., Kulmala, M., Worsnop, D., Jiang, J., and Ding, A.: Secondary organic aerosol formed by  
127 condensing anthropogenic vapours over China's megacities, *Nature Geoscience*, 10.1038/s41561-022-  
128 00922-5, 2022.
- 129 Wang, M., Chen, D., Xiao, M., Ye, Q., Stolzenburg, D., Hofbauer, V., Ye, P., Vogel, A. L., Mauldin, R.  
130 L., Amorim, A., Baccarini, A., Baumgartner, B., Brilke, S., Dada, L., Dias, A., Duplissy, J., Finkenzeller,  
131 H., Garmash, O., He, X.-C., Hoyle, C. R., Kim, C., Kvashnin, A., Lehtipalo, K., Fischer, L., Molteni, U.,  
132 Petäjä, T., Pospisilova, V., Quéléver, L. L. J., Rissanen, M., Simon, M., Tauber, C., Tomé, A., Wagner,  
133 A. C., Weitz, L., Volkamer, R., Winkler, P. M., Kirkby, J., Worsnop, D. R., Kulmala, M., Baltensperger,  
134 U., Dommen, J., El-Haddad, I., and Donahue, N. M.: Photo-oxidation of Aromatic Hydrocarbons  
135 Produces Low-Volatility Organic Compounds, *Environmental Science & Technology*, 54, 7911-7921,  
136 10.1021/acs.est.0c02100, 2020.
- 137 Wang, Y., Clusius, P., Yan, C., Dällenbach, K., Yin, R., Wang, M., He, X.-C., Chu, B., Lu, Y., Dada, L.,  
138 Kangasluoma, J., Rantala, P., Deng, C., Lin, Z., Wang, W., Yao, L., Fan, X., Du, W., Cai, J., Heikkinen,  
139 L., Tham, Y. J., Zha, Q., Ling, Z., Junninen, H., Petäjä, T., Ge, M., Wang, Y., He, H., Worsnop, D. R.,  
140 Kerminen, V.-M., Bianchi, F., Wang, L., Jiang, J., Liu, Y., Boy, M., Ehn, M., Donahue, N. M., and  
141 Kulmala, M.: Molecular Composition of Oxygenated Organic Molecules and Their Contributions to  
142 Organic Aerosol in Beijing, *Environmental Science & Technology*, 56, 770-778,  
143 10.1021/acs.est.1c05191, 2022.
- 144
